# Supplementary material for: A Probabilistic Approach to Visualize the Effect of Missing Data on PCA in Ancient Human Genomics
Source: Research Square preprint supplement (doi:10.21203/rs.3.rs-6105854/v1), 2025-03-11
Supplement: Supplementary file 1 [file 44cc71882ece190255ec225f.pdf]

**Supplemental Material for the paper “A Probabilistic Approach to Visualize the Effect of Missing Data on PCA in Ancient Human Genomics”**

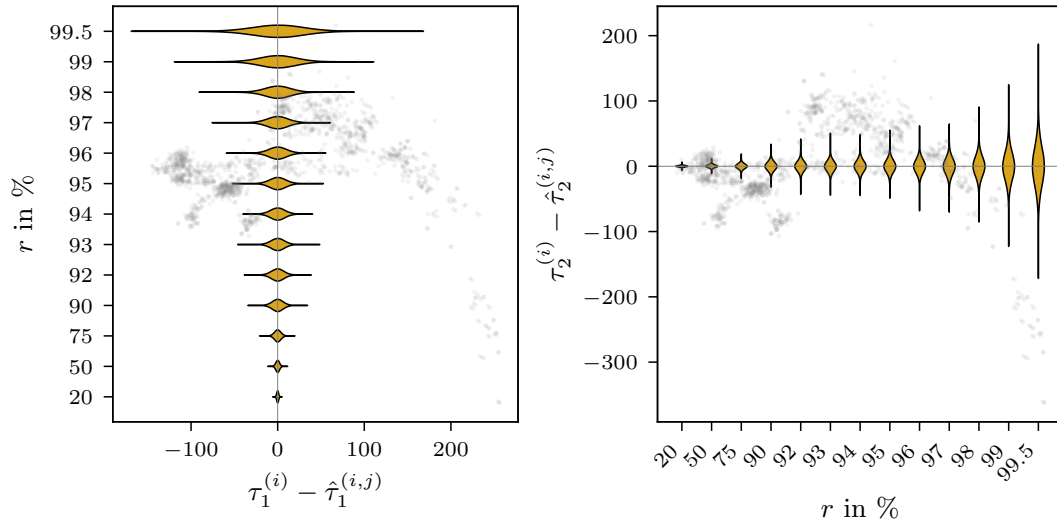

Figure S1: Violin plots of discrepancy distributions in PC1 and PC2 at varying downsampling rates ( $r$ ). To assess the impact of missing loci, loci were randomly omitted from 15 high-coverage ancient samples at progressively increasing rates ( $r$ ). For each sample  $i$ , this process was repeated 20,000 times. The discrepancies between the resulting SmartPCA projections  $\{\hat{\tau}^{(i,j)}\}_{j=1,\dots,20000}$  and their respective reference projection  $\tau^{(i)}$  were computed. The component-wise distributions of these discrepancies are visualized as violin plots, illustrating how the spread of discrepancies in PC1 and PC2 changes with increasing downsampling rates. To provide a reference scale for the magnitude of  $\tau^{(i)} - \hat{\tau}^{(i,j)}$ , the map of modern PCA projections is shown in the background. Note that only the corresponding axis (left: PC1, right: PC2) is meaningful for interpreting the spread of discrepancies.

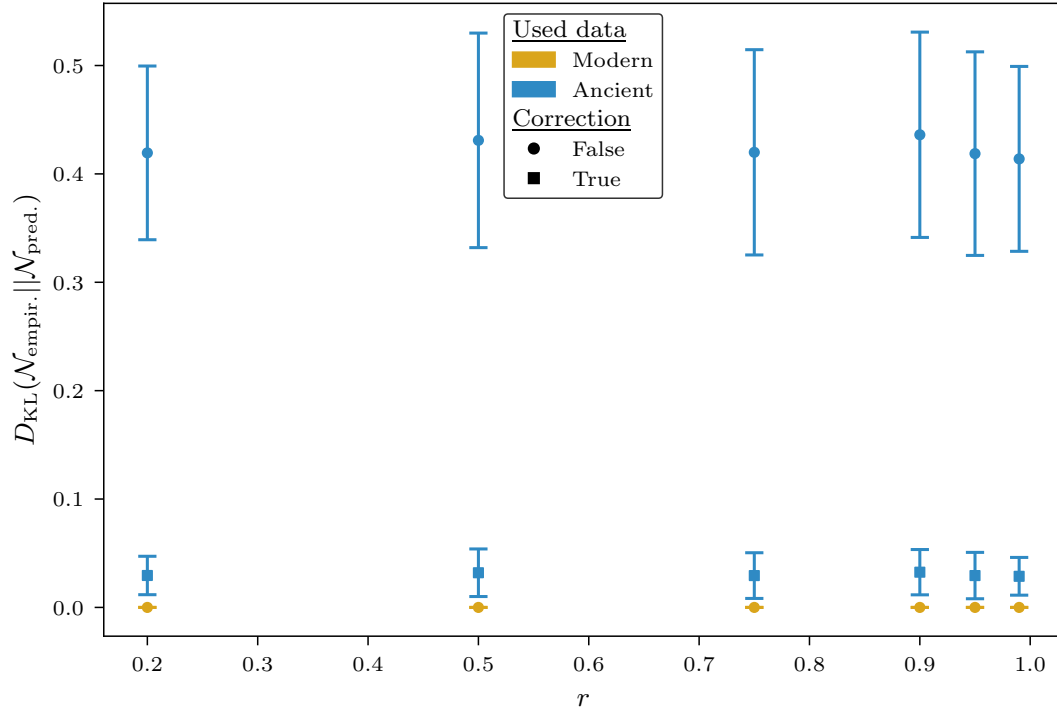

Figure S2: Kullback-Leibler (KL) divergence between empirical and predicted Gaussian discrepancy distributions. High-coverage modern and ancient samples were analyzed by randomly omitting loci at a specified rate  $r$ . For each sample, the discrepancy in the first two principal components between the resulting SmartPCA embeddings and the reference embeddings was computed. From these discrepancies, the empirical Gaussian distribution was estimated. Using the same sets of omitted loci, the Gaussian discrepancy distribution was predicted based on Equations (13)-(17). The KL divergence between the empirical and predicted distributions was then calculated. This process was repeated for 100 random draws of missing loci sets, with the mean KL divergence and standard deviation plotted to summarize the results. Marker types indicate whether a variance adjustment was applied during the prediction of the distribution.

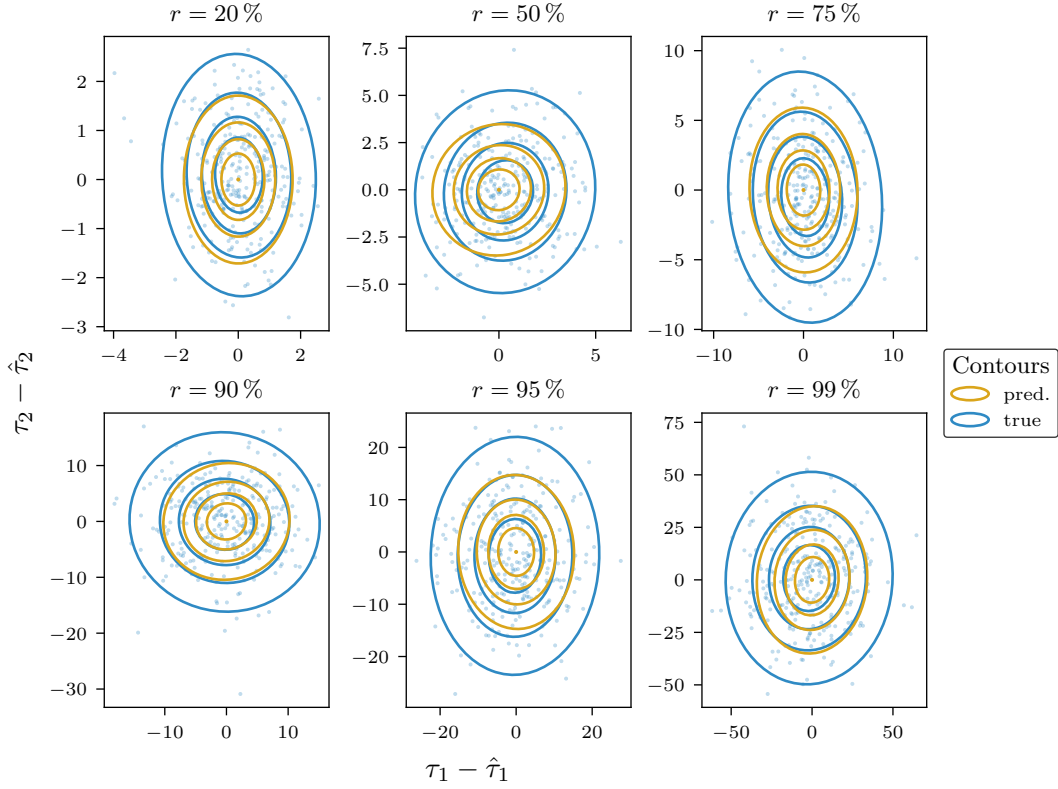

Figure S3: Comparison of empirically determined and predicted Gaussian discrepancy distributions for ancient genotype sample embeddings. For each of 304 high-coverage ancient West Eurasian genotype samples, a random set of loci was omitted at the specified downsampling rate  $r$ . The discrepancy in the first two principal components between the resulting SmartPCA sample embeddings and the reference embeddings was calculated and plotted as scatter points. From this data, the empirical Gaussian distribution was estimated and represented by blue contours at the specified quantiles. Using the corresponding sets of omitted loci, the Gaussian discrepancy distribution was predicted based on Equations (13)-(17), with the predicted contours shown in gold overlaying the blue contours. These predictions were made without adjustments for the increased variance typically observed in ancient samples compared to modern samples.

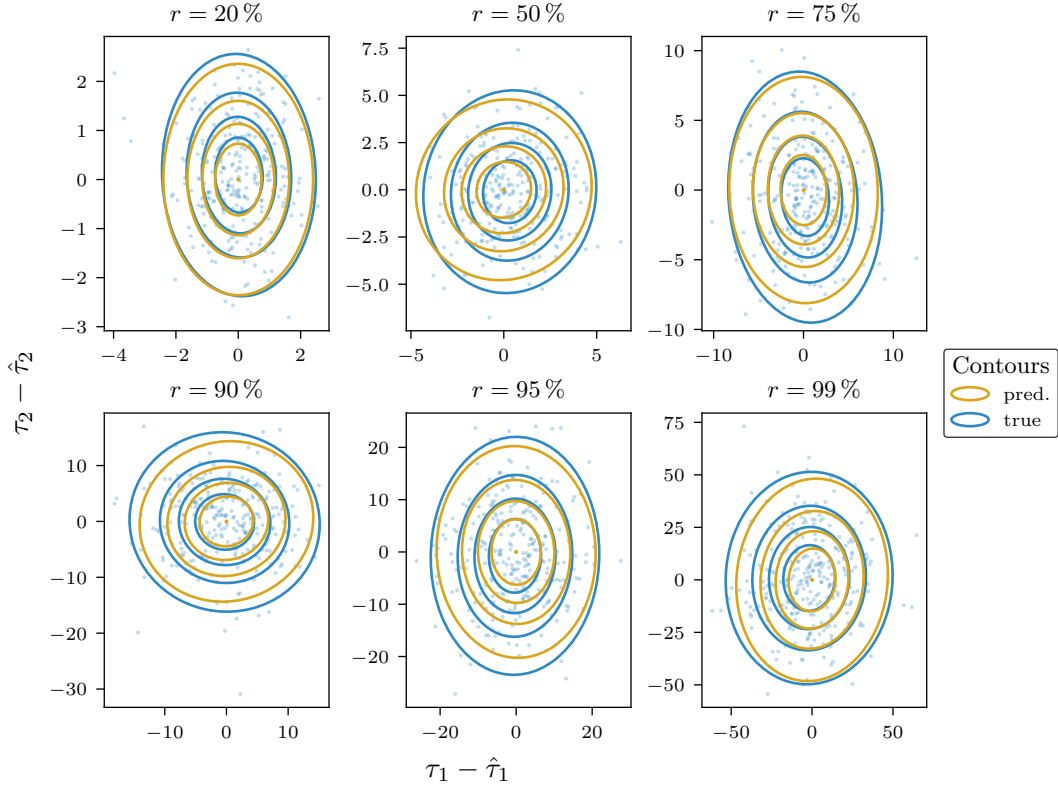

Figure S4: Comparison of empirically determined and predicted Gaussian discrepancy distributions for ancient genotype sample embeddings. For each of 304 high-coverage ancient West Eurasian genotype samples, a random set of loci was omitted at the specified downsampling rate  $r$ . The discrepancy in the first two principal components between the resulting SmartPCA sample embeddings and the reference embeddings was calculated and plotted as scatter points. From this data, the empirical Gaussian distribution was estimated and represented by blue contours at the specified quantiles. Using the corresponding sets of omitted loci, the Gaussian discrepancy distribution was predicted based on Equations (13)-(17), with the predicted contours shown in gold overlaying the blue contours. Variance adjustments were incorporated into the prediction framework to account for the increased variance typically observed in ancient samples compared to modern ones.

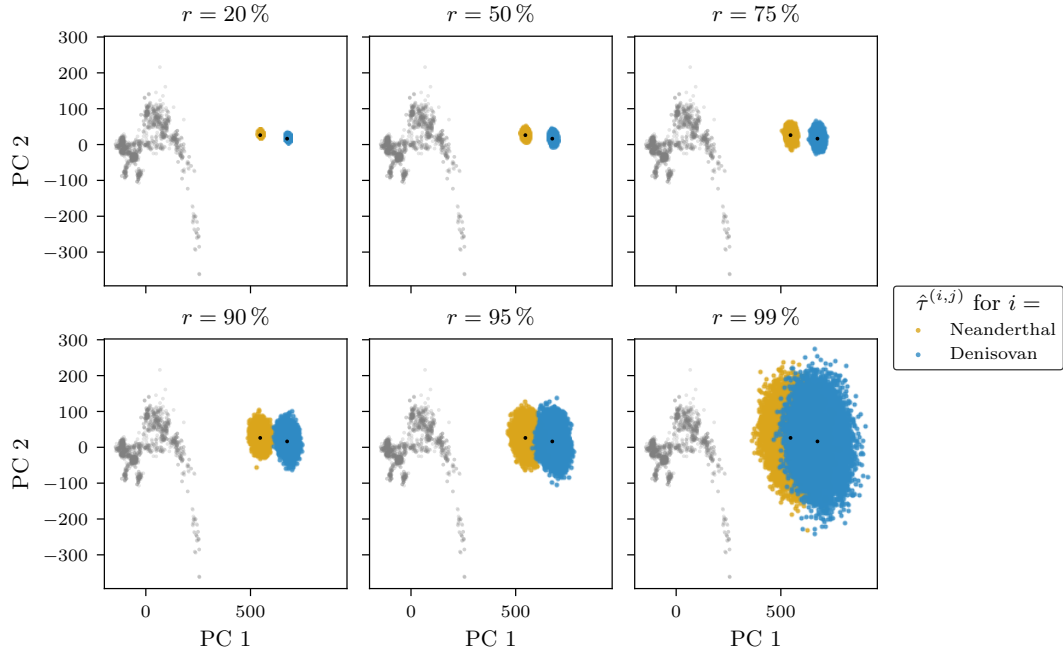

Figure S5: Impact of missing loci on SmartPCA projections of out-of-distribution ancient genotype samples. The projections of the modern West Eurasian samples, used to compute the principal component (PC) subspace, are shown in gray. The black point represents the projection of the high-coverage ancient individuals (Neanderthal & Denisovan), considered as the *true* projection  $\{\tau^{(i)}\}$ . To evaluate the impact of missing loci, loci were randomly omitted from the ancient sample at an increasing rate  $r$ . This process was repeated 20,000 times. The resulting SmartPCA projections,  $\{\hat{\tau}^{(i,j)}\}_{j=1,\dots,20000}$ , are shown in orange and blue for the respective individuals.
